# Supplementary material for: Chiroptical sensing of oligonucleotides with a cyclic octapyrrole
Source: Royal Society of Chemistry journal article supplement (doi:10.1039/c4qo00268g), 2014-11-28
Supplement: c4qo00268g1.pdf [file c4qo00268g1.pdf]

## Supporting Information

### Chiroptical Sensing of Oligonucleotides with a Cyclic Octapyrrole

Machiko Ie, Jun-ichiro Setsune, Kazuo Eda, and Akihiko Tsuda\*

Department of Chemistry, Graduate School of Science, Kobe University, 1-1 Rokkodai-cho,  
Nada-ku, Kobe 657-8501, Japan

#### Table of Contents

1. DLS measurement for **8P**·HCl in water
2. CD spectroscopy for mixtures of **8P**·HCl and (*R*)- or (*S*)-mandelic acid
3. CPK model studies for the complexation

## 1. DLS measurement for 8P·HCl in water

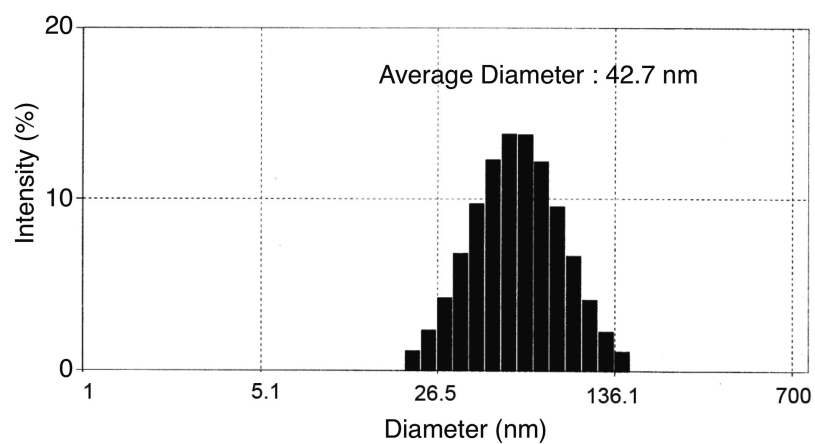

**Fig. S1** DLS histogram profile of **8P·HCl** in water at 10 °C. [**8P·HCl**] =  $1.8 \times 10^{-5}$  M

## 2. CD spectroscopy for mixtures of $8P \cdot HCl$ and (*R*)- or (*S*)-mandelic acid

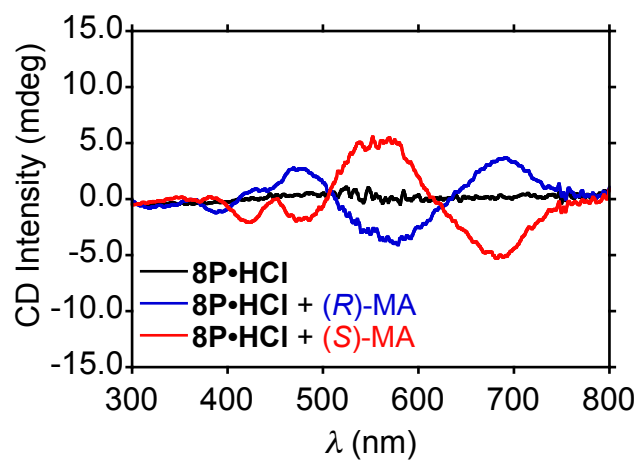

**Fig. S2** CD spectra of  $8P \cdot HCl$  in the presence and absence of (*R*)- or (*S*)-mandelic acid in water at 10 °C.

### 3. CPK model studies for the complexation

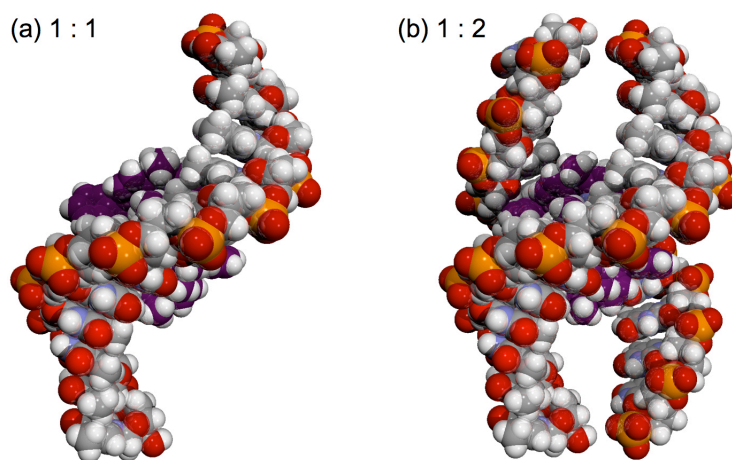

**Fig. S3** CPK model studies for possible associations of **8P** and dT<sub>12</sub> in (a) 1:1 and (b) 1:2 complexations.
